# Supplementary material for: ‘Dark logic’: theorising the harmful consequences of public health interventions
Source: HighWire-hosted journal article supplement (doi:10.1136/jech-2014-204671), 2014-11-17
Supplement: jech-2014-204671supp.pdf [file jech-2014-204671supp.pdf]

**Supplementary File: Audited protocols**

| Study author;<br>Funding<br>reference<br>number | Evaluation<br>Design | Mention<br>of harm | Planned empirical measures of harms (harmful externalities) |             | Planned methods to examine mechanisms underlying any harms found |                                          |
|-------------------------------------------------|----------------------|--------------------|-------------------------------------------------------------|-------------|------------------------------------------------------------------|------------------------------------------|
|                                                 |                      |                    | Quantitative                                                | Qualitative | Qualitative research on participant accounts of mechanisms       | Quantitative moderator/mediator analyses |
| Audrey<br>10/3001/04                            | RCT                  | Y                  | N                                                           | N           | N                                                                | N                                        |
| Barnes<br>11/3002/02                            | RCT                  | Y                  | Y                                                           | N           | N                                                                | N                                        |
| Bower<br>12/3090/05                             | RCT                  | N                  | N                                                           | N           | N                                                                | N                                        |
| Cade<br>09/3001/19                              | RCT                  | Y                  | N                                                           | N           | N                                                                | N                                        |
| Connolly<br>10/3006/02                          | RCT                  | Y                  | N                                                           | N           | N                                                                | N                                        |
| Crombie<br>11/3050/30                           | RCT                  | Y                  | Y                                                           | N           | N                                                                | N                                        |
| Crombie<br>09/3001/09                           | RCT                  | Y                  | Y                                                           | N           | N                                                                | N                                        |
| Cummins<br>09/3005/09                           | QE                   | N                  | N                                                           | N           | N                                                                | N                                        |
| Edwards<br>11/3004/02                           | QE                   | N                  | N                                                           | N           | N                                                                | N                                        |
| Elliot<br>10/3009/06                            | Lab                  | N                  | N                                                           | N           | N                                                                | N                                        |
| Elsey<br>11/3050/08                             | QE                   | N                  | N                                                           | N           | N                                                                | N                                        |
| Fone<br>09/3007/02                              | QE                   | N                  | N                                                           | N           | N                                                                | N                                        |
| Ford<br>10/3006/07                              | RCT                  | Y                  | Y                                                           | N           | N                                                                | N                                        |

|                             |     |   |   |   |   |   |
|-----------------------------|-----|---|---|---|---|---|
| Green<br>09/3001/13         | QE  | N | N | N | N | N |
| Haw<br>10/3000/07           | BA  | Y | N | Y | N | N |
| Henderson<br>10/3006/13     | RCT | N | N | N | N | N |
| Henderson<br>11/3002/01     | RCT | N | N | N | N | N |
| Humphrey<br>10/3006/01      | RCT | Y | N | N | N | N |
| Jago<br>11/3050/01          | RCT | N | N | N | N | N |
| Law<br>09/3005/05           | RCT | Y | Y | N | N | N |
| Lawlor<br>09/3005/04        | RCT | N | N | N | N | N |
| Moore<br>10/3010/21         | RCT | Y | N | N | N | N |
| Mountain<br>09/3004/01      | RCT | Y | Y | N | N | N |
| Newbury-Birch<br>10/3002/07 | RCT | N | N | N | N | N |
| Oglivie<br>11/3005/07       | QE  | Y | N | N | N | N |
| Oglivie<br>09/3001/06       | QE  | Y | N | N | N | N |
| Poortinga<br>11/3020/05     | QE  | Y | N | N | N | N |
| Popay<br>09/3008/07         | QE  | Y | N | N | N | N |
| Pretty<br>12/3000/40        | QE  | Y | Y | N | N | N |

|                                |                     |   |   |   |   |   |
|--------------------------------|---------------------|---|---|---|---|---|
| Robling<br>11/3002/11          | RCT data<br>linkage | Y | N | N | N | N |
| Segrott<br>10/3002/03          | RCT                 | Y | Y | Y | N | N |
| Siddiqi<br>09/3000/05          | RCT                 | Y | N | N | N | N |
| Stallard<br>09/3000/03         | RCT                 | Y | N | N | N | N |
| Stansfeld<br>10/3007/06        | RCT                 | Y | N | Y | N | N |
| Sumnall<br>10/3002/09          | RCT                 | N | N | N | N | N |
| Szatkowski<br>11/3010/02       | RCT                 | Y | N | N | N | N |
| Viner<br>12/153/60             | RCT                 | Y | N | N | N | N |
| Ward<br>Thompson<br>10/3005/18 | QE                  | N | N | N | N | N |
| White<br>09/3009/02            | RCT                 | Y | N | Y | N | Y |
| White<br>12/3060/03            | RCT                 | Y | N | N | N | N |
| Wilkinson<br>11/3005/31        | QE                  | Y | Y | Y | N | N |
| Wyat<br>10/3010/01             | RCT                 | Y | N | N | N | N |
| Wyke<br>09/3010/06             | RCT                 | Y | Y | Y | N | N |
| Wright<br>11/3001/16           | RCT                 | Y | N | N | N | N |

Key: RCT: Randomized control trial; QE: Quasi-experimental (non-random controlled studies), BA: Before and after; Lab: laboratory study; Y: Yes; N: No.
